# Supplementary material for: Cystathionine Gamma Lyase Is Regulated by Flow and Controls Smooth Muscle Migration in Human Saphenous Vein
Source: MDPI journal article supplement (doi:10.3390/antiox12091731), 2023-09-07
Supplement: s1 [file s1]

## Supplementary Material

**Supplementary Table S1: Antibodies**

| Target antigen                          | Vendor                                                                       | Catalog #   | Working concentration        | RRID        |
|-----------------------------------------|------------------------------------------------------------------------------|-------------|------------------------------|-------------|
| <b>Goat anti-Rabbit Alexa Fluor 594</b> | Thermo Fisher Scientific, Ecublens, Switzerland                              | A32740      | 1/250 (ICC)                  | AB_2762824  |
| <b>Goat anti-Rabbit Alexa Fluor 488</b> | Thermo Fisher Scientific, Ecublens, Switzerland                              | A11034      | 1/500 (ICC)                  | AB_2576217  |
| <b>Anti-Rabbit HRPO</b>                 | Thermo Fisher Scientific, Ecublens, Switzerland                              | 31460       | 1/20000 (WB)                 | AB_228341   |
| <b>Anti-mouse HRPO</b>                  | Jackson ImmunoResearch Labs, Thermo Fisher Scientific, Ecublens, Switzerland | 115-035-146 | 1/15000 (WB)                 | AB_2307392  |
| <b>BrdU</b>                             | BD Biosciences, Allschwil, Switzerland                                       | 555627      | 1/200 (ICC)                  | AB_10015222 |
| <b>VWF</b>                              | DAKO, Agilent Technologies (Schweiz) AG, Basel, Switzerland                  | A0082       | 1/20000 (IHC-P)              |             |
| <b>eNOS</b>                             | BD Biosciences, Allschwil, Switzerland                                       | 610297      | 1/1000 (WB)                  |             |
| <b>CSE</b>                              | Proteintech, LubioScience GmbH, Zurich, Switzerland                          | 12217-1-AP  | 1/1000 (WB)<br>1/250 (IHC-P) | AB_2087497  |
| <b>CBS</b>                              | Santa Cruz Biotechnology, Heidelberg, Germany                                | sc-133154   | 1/1000 (WB)<br>1/100 (IHC-P) | AB_2244094  |
| <b>3-MST</b>                            | Sigma-Aldrich, Merck KGaA, Darmstadt, Germany                                | HPA001240   | 1/500 (IHC-P)                | AB_1079408  |
| <b>3-MST</b>                            | Novus Biologicals, Bio-Techne AG, Zug, Switzerland                           | NBP1-82617  | 1/2000 (WB)                  | AB_11014969 |

**Supplementary Table S2: Reagents**

| <b>Kit/product</b>                                     | <b>Vendor</b>                                                             | <b>Catalog #</b> |
|--------------------------------------------------------|---------------------------------------------------------------------------|------------------|
| BrdU                                                   | Sigma-Aldrich, Merck KGaA, Darmstadt, Germany                             | B5002            |
| Immobilon Western Chemiluminescent HRP Substate        | Millipore, Merck KGaA, Darmstadt, Germany                                 | WBKLS0050        |
| Immobilon-P transfer membrane                          | Millipore, Merck KGaA, Darmstadt, Germany                                 | IPVH00010        |
| EnVision® + Dual Link System-HRP (DAB+)                | DAKO (now Agilent Technologies (Schweiz) AG, Basel, Switzerland)          | K4065            |
| Vectashield Antifade Mounting Medium with DAPI         | Vector Laboratories, Reactolab, Waldeck, Switzerland                      | H-1200           |
| Pierce reversible protein Stain Kit for PDGF membranes | Thermo Fisher Scientific, Ecublens, Switzerland                           | 24585            |
| RPMI-1640 Glutamax I                                   | Gibco, Thermo Fisher Scientific, Ecublens, Switzerland                    | 61870-010        |
| Gelatin type B                                         | Sigma-Aldrich, Merck KGaA, Darmstadt, Germany                             | G9391            |
| TriPure™                                               | Roche Diagnostics, Rotkreuz, Switzerland                                  | 11667157001      |
| DAz-2                                                  | Cayman Chemicals, Chemie Brunschwig AG Basel, Switzerland                 | 13382            |
| Cyanine 5.5 alkyne                                     | Lumiprobe, Waldeck, Switzerland                                           | C70B0            |
| 4-Chloro-7-Nitrobenzofurazan                           | Sigma-Aldrich, Merck KGaA, Darmstadt, Germany                             | 163260           |
| SF <sub>7</sub> -AM fluorescent probe                  | Sigma-Aldrich, Merck KGaA, Darmstadt, Germany                             | 748110           |
| Resorcine-Fuchsin Weigert                              | Reactolab, Waldeck, Switzerland                                           | 2E-030           |
| Hematoxylin crist.                                     | Merck KGaA, Darmstadt, Germany                                            | 1.04302.0025     |
| Acid Fuchsin                                           | Sigma-Aldrich, Merck KGaA, Darmstadt, Germany                             | F8129            |
| Picric acid                                            | Sigma-Aldrich, Merck KGaA, Darmstadt, Germany                             | 197378           |
| Neo-Clear                                              | Merck KGaA, Darmstadt, Germany                                            | 1.09843.5000     |
| Ethanol absolu                                         | Merck KGaA, Darmstadt, Germany                                            | 1.00983.2500     |
| Phosphate Buffered Saline (PBS)                        | Laboratorium Dr. G. Bichsel AG, Unterseen, Switzerland                    | 100 0 324        |
| L-cysteine                                             | Sigma-Aldrich, Merck KGaA, Darmstadt, Germany                             | C7352            |
| Sodium dodecyl sulfate (SDS)                           | Promega AG, Dübendorf, Germany                                            | H5114            |
| Tween-20                                               | Applichem GMBH, Darmstadt, Germany                                        | A1389            |
| Triton x-100                                           | Sigma-Aldrich, Merck KGaA, Darmstadt, Germany                             | T8787            |
| Lead Acetate trihydrate                                | Acros Organics (Now Thermo Fisher Scientific)                             | 423841000        |
| Pyridoxal 5'-phosphate monohydrate                     | Sigma-Aldrich, Merck KGaA, Darmstadt, Germany                             | 82870            |
| Bovine Serum albumin (BSA)                             | Applichem GMBH, Darmstadt, Germany                                        | A1391            |
| DC™ Protein Assay Kit I                                | Bio-Rad Laboratories, Cressier, Switzerland                               | 5000111          |
| Fast SYBR™ Green Master Mix                            | Applied Biosystems; Agilent Technologies (Schweiz) AG, Basel, Switzerland | 4385618          |
| PrimeScript RT Reagent Kit (Perfect Real Time)         | Takara Bio Europe SAS, Saint-Germain-en-Laye, France                      | RR037B           |

**Supplemental Table S3: qPCR oligo primers**

| Primer Name | Sequence                                                  |
|-------------|-----------------------------------------------------------|
| Human CTH   | Fw: CCAGCACTCGGGTTTTGAAT<br>Rv: TACTTAGCCCCATCCAGTGC      |
| Human CBS   | Fw: ATGGTGACGCTTGGGAACAT<br>Rv: GCGGATCTGTTTGAAGTGC       |
| Human MPST  | Fw: CCGAGACGGCATTGAACCT<br>Rv: CCTGGCTCAGGAAGTCTGTG       |
| Human NOS3  | Fw: GCCGGAACAGCACAAAGAGTTA<br>Rv: CCCTGCACTGTCTGTGTTACT   |
| Human HMOX1 | Fw: AGGAGGTCATCCCCTACACA<br>Rv: GCGGTAGAGCTGCTTGAAGT      |
| Human TXN1  | Fw: AGCCTTTCTTTTCATTCCCTCTC<br>Rv: ACATCCTGACAGTCATCCACAT |
| Human ATF4  | Fw: TTAAGCCATGGCGCTTCTCA<br>Rv: ATTTGCGTCATGTTGCGGTG      |
| Human KLF2  | Fw: TATCTTGCCGTCCTTTGCCA<br>Rv: CGTTGTTTAGGTCTCATCCG      |

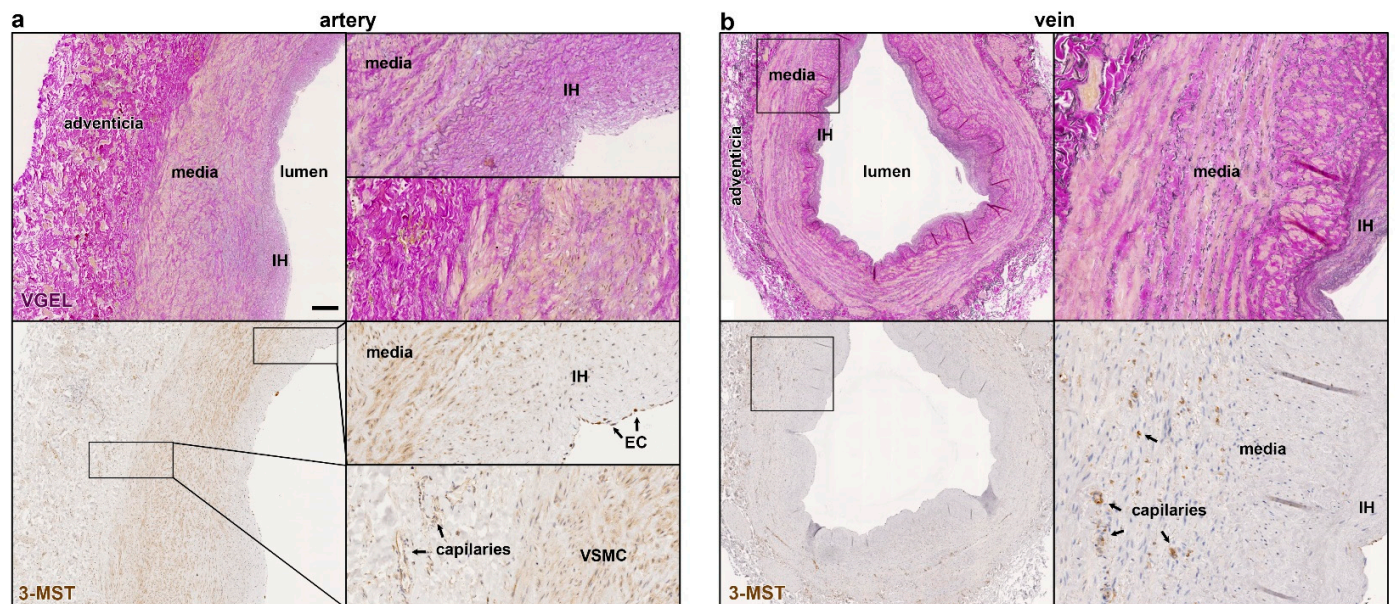

**Figure S1. 3MST is mainly expressed in endothelial cells in large artery and vein segments.**

Representative VGEL staining or 3-MST immunostaining in freshly isolated human aorta (**a**) and saphenous vein (**b**). Images are representative of 4 to 5 different arteries/veins. IH: intimal hyperplasia. Insets are 3-fold magnifications.

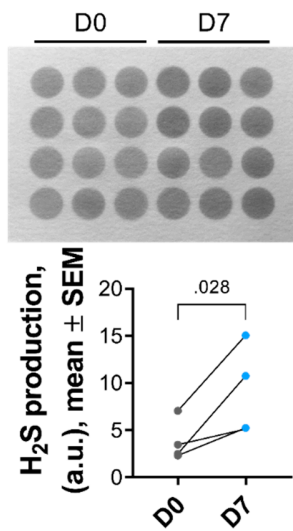

**Figure S2. Static vein culture promotes CSE-derived H<sub>2</sub>S production.** Lead acetate assay of freshly isolated human vein segments (D0) or after 7 days (D7) in static culture. 4 different veins/patients in triplicates. P value as determined by bilateral paired t-test.



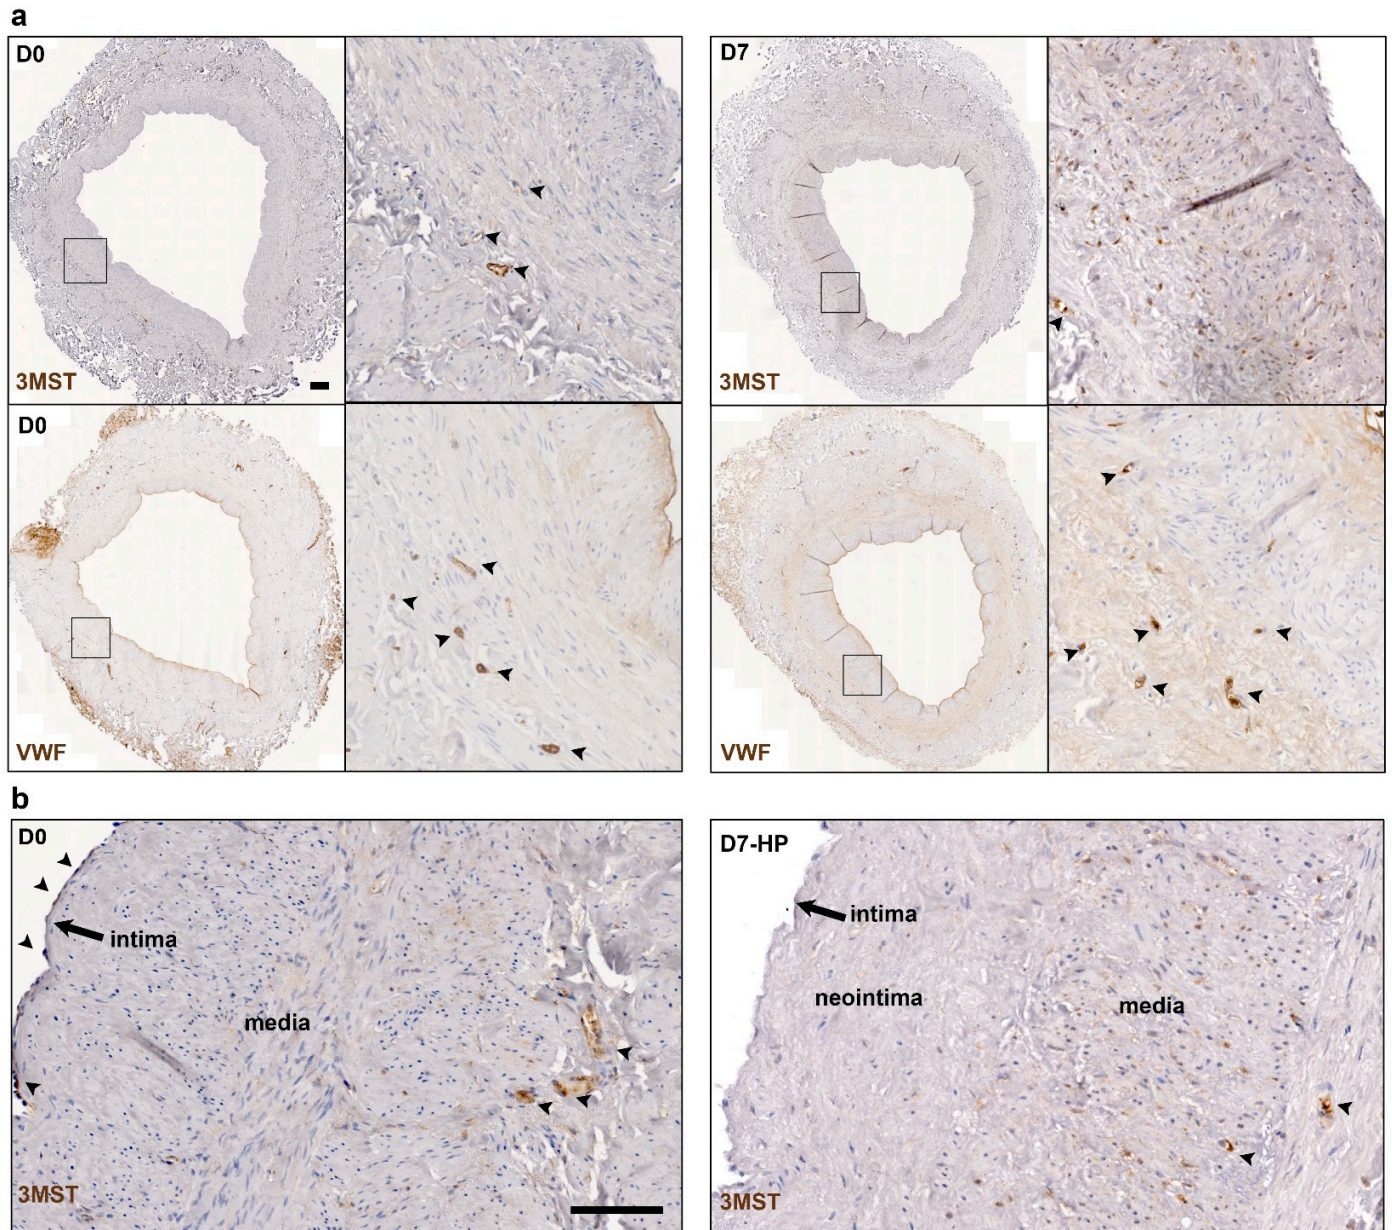

**Figure S3. Static vein culture promotes 3-MST expression in the media of saphenous veins**

(a) 3-MST immunostaining in freshly isolated human saphenous vein (D0) or after 7 days (D7) in static culture. Representative of 5 different veins/patients. Insets are 5-fold magnifications from black boxes. Scale bar =100  $\mu$ m. (b) 3-MST immunostaining in freshly isolated human saphenous vein (D0) or after 7 days in culture under arterial conditions (D7-HP). Scale bar =200  $\mu$ m.

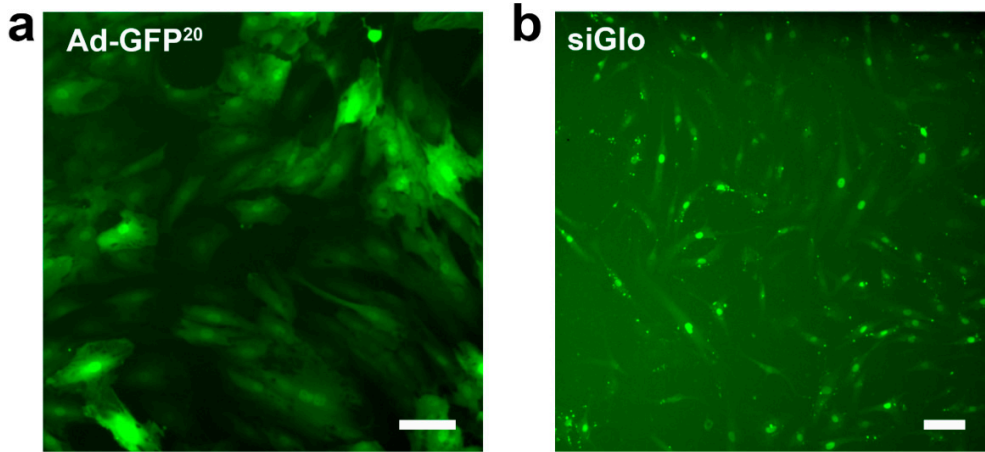

**Figure S4. Infection and transfection efficiency.** (a) Live-cell imaging of GFP fluorescence 48h post VSMC infection with an adenovirus encoding GFP (AdGFP) at MOI 20. (b) Live-cell imaging of siGlo fluorescence 24h post VSMC. Images are representative of 4 independent experiments. Scale bar 100  $\mu$ m.

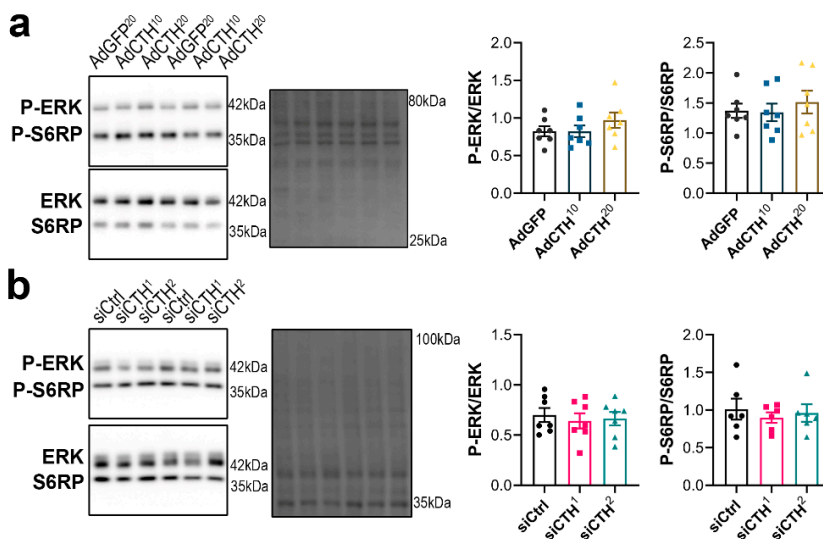

**Figure S5. CSE modulation does not regulate P-ERK or P-S6RP levels.** (a) VSMC were infected with an adenovirus encoding GFP (AdGFP) or CSE (AdCTH) at MOI 10 or 20, as indicated. (b) VSMC were transfected with a control siRNA (siCtrl) or two distinct CTH siRNA (siCTH 1 and 2), as indicated. (a,b) Representative Western blot analyses and quantitative assessment of P-ERK over total ERK and P-S6RP over S6RP. Data shown as mean  $\pm$  SEM of 6 to 7 independent experiments. No statistical differences as determined by repeated measures one-way ANOVA.
